# Supplementary material
Source: publisher figshare collection journal article supplement (https://tandf.figshare.com/ndownloader/files/14793419)
Supplement: Supplementary file 1 [file 14793419]

**Supplementary Material**

Box 2. Guidelines and drug dosages for emergencies during IV sedation in assisted conception procedures (Resuscitation Council (UK), 2010).

Box 1. Example of pre-procedure checklist

**OPIATE REVERSAL**

Naloxone 100-200mcg IV every 2-3 minutes

**BENZODIAZEPINE REVERSAL**

Flumazenil 200mcg IV every 15 minutes, maximum dose 1g

**BRADYCARDIA**

Atropine 0.6mg IV

**ANAPHYLAXIS**

Adrenaline 0.5 mg IM (= 500 micrograms = 0.5 mL of 1:1000)

Further doses can be given at about 5-minute intervals according to the patient’s response.

**CARDIAC ARREST**

Adrenaline 1mg IV (1ml of Adrenaline 1 in 1000)

NAME . . . . . . . . . . . . . . . . . . . . . . . . . . . . . . . . . . . . . . . . . . . . .

DATE OF BIRTH . . . . . . . . . . . . . . . . . . . . . . . . . . . . . . . . . . . . .

Egg Collection scheduled for . . . . . . . . . . . . . . . . . . . . . . . . . .

HCG injection given at . . . . . . . . . . . . . . . . . . . . . . . . . . . . . . .

NBM since . . . . . . . . . . . . . . . . . . . . . . . . . . . . . . . . . . . . . . . . .

OBSERVATIONS

Pulse . . . . . . . . . . . . . . . . . . . . . . . . . . . . . . . . . . . . . . . . . . . . .

Blood Pressure . . . . . . . . . . . . . . . . . . . . . . . . . . . . . . . . . . . . .

Patient Questionnaire Completed Yes / No

Consent Forms Signed Yes / No

Identification bracelet Yes / No

Jewellery removed Yes / No

Make-up removed Yes / No

Loose/Artificial teeth Yes / No

Contact lenses Yes / No

Allergies Yes / No

Transport / Escort home Yes / No

Checked by . . . . . . . . . . . . . . . . . . . . . . . . . .

Date. . . . . . . . . . . . . .

12. References

Table 1. The modified Mallampati test for airway assessment. Assignment to class 3 or 4 predicts a difficult airway (Khan, Kashfi & Ebrahimkhani, 2003).

Table 2. The upper lip bite test (Khan, Kashfi & Ebrahimkhani, 2003).

| **The upper lip bite test** | |
| --- | --- |
| The patient is instructed to protrude their mandible forward and bite their upper lip.  Class III is predictive of a difficult airway. | Class I. Lower incisors bite the upper lip above the vermilion border, mucosa not being visible |
| Class II. Lower incisors bite the upper lip below the vermilion border, mucosa partially visible |
| Class III. Lower incisors fail to bite the upper lip |
